# Supplementary material for: UCPs/Zn2GeO4:Mn2+/g-C3N4 heterojunction engineered injectable thermosensitive hydrogel for oxygen independent breast cancer neoadjuvant photodynamic therapy
Source: Royal Society of Chemistry journal article supplement (doi:10.1039/d0bm01876g), 2021-01-01
Supplement: d0bm01876g1.pdf [file d0bm01876g1.pdf]

### Supporting information

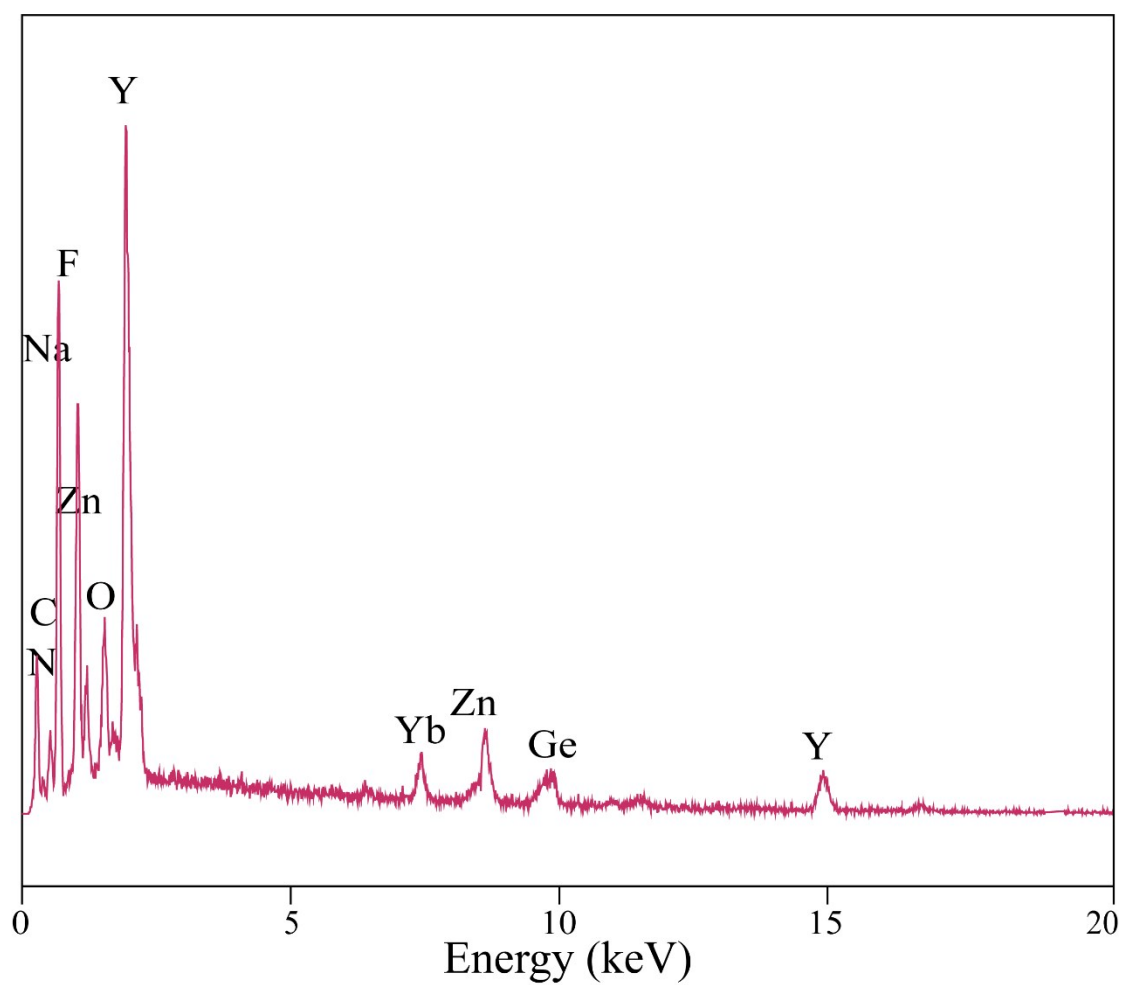

**Fig. S1.** The EDS spectrum of UZC.

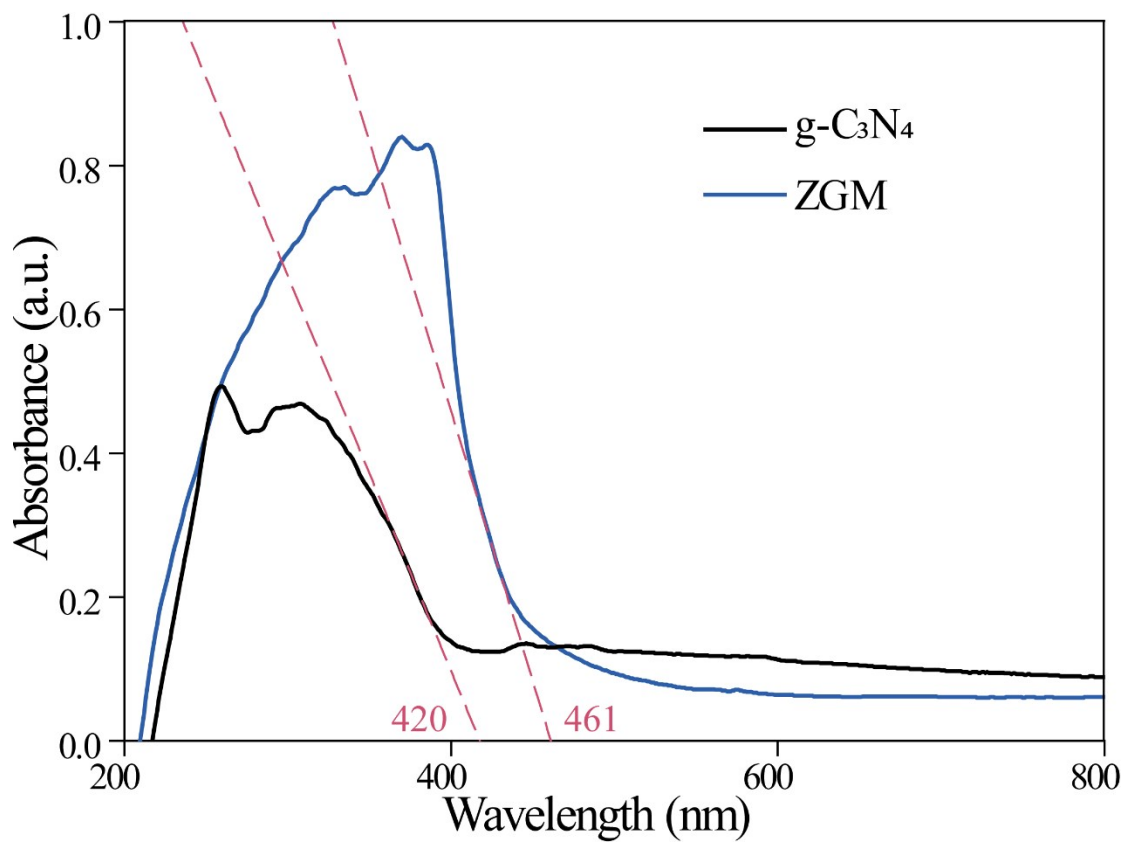

**Fig. S2.** UV-Vis diffuse reflectance spectra of ZGM and g-C<sub>3</sub>N<sub>4</sub>.

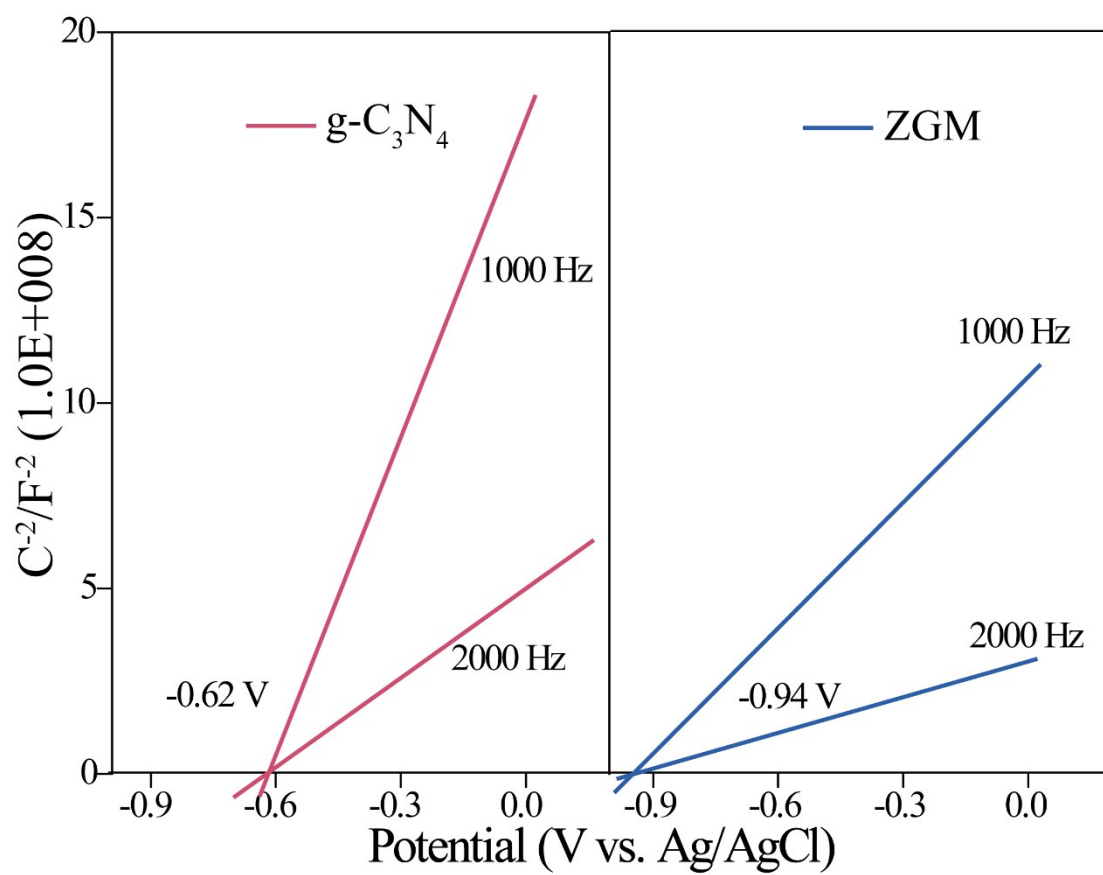

Fig. S3. Mott-Schottky plots of ZGM and  $g-C_3N_4$ .

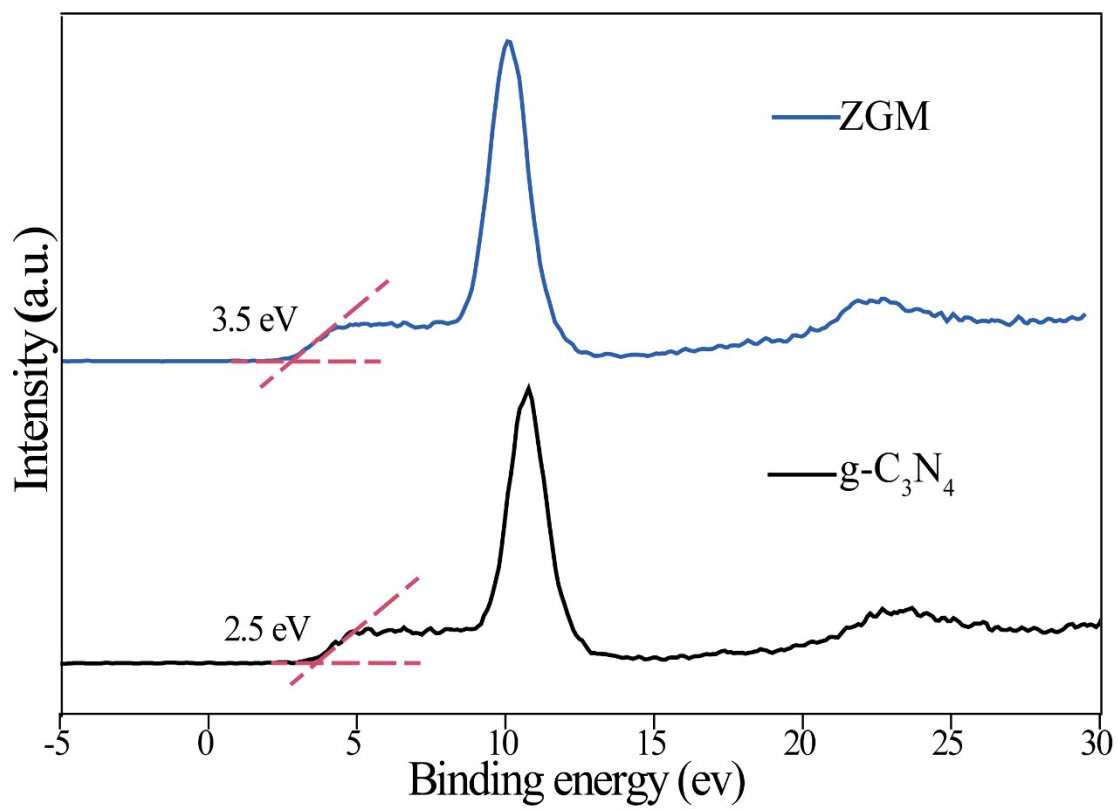

**Fig. S4.** Valance band XPS spectra of ZGM and g-C<sub>3</sub>N<sub>4</sub>.

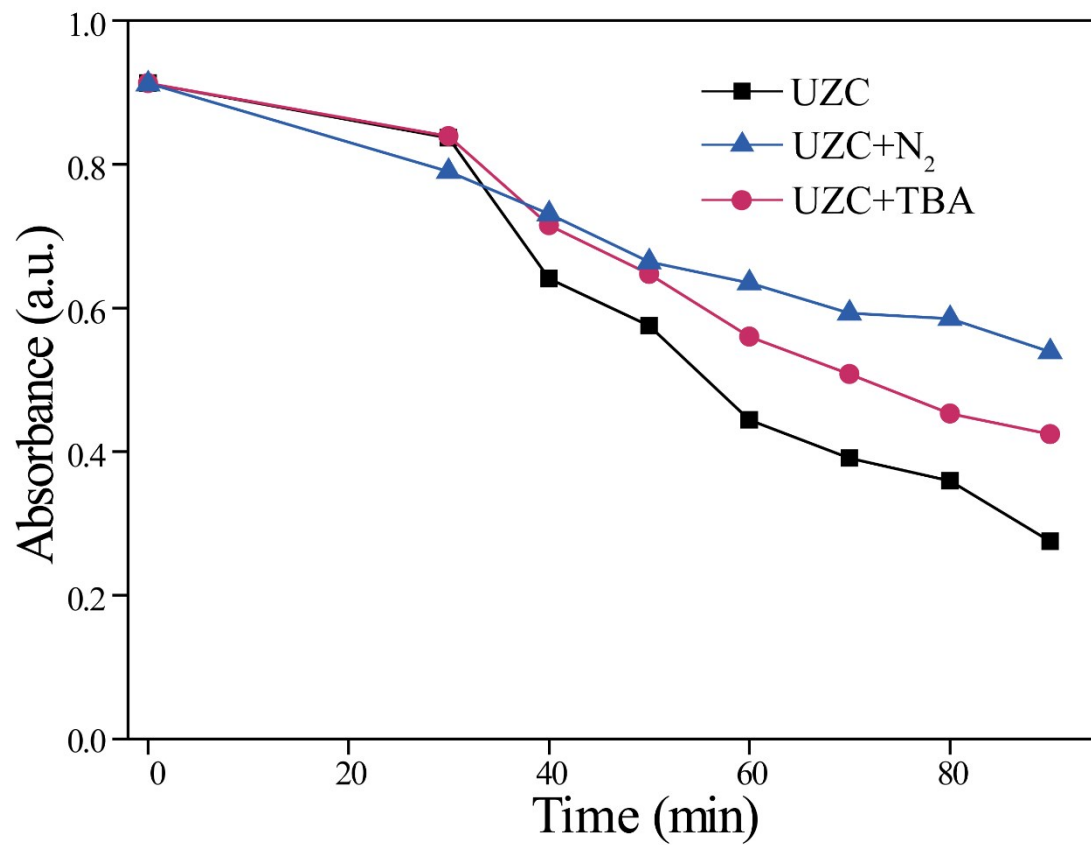

Fig. S5. The degradation curves of RhB with different treatments.
